# Supplementary material for: Highly adsorptive graphene aerogel microspheres with center-diverging microchannel structures
Source: Royal Society of Chemistry journal article supplement (doi:10.1039/c5ta09540a), 2015-12-09
Supplement: c5ta09540a1.pdf [file c5ta09540a1.pdf]

## Electronic Supplementary Information (ESI)

# Highly Adsorptive Graphene Aerogel Microsphere with Center-diverging Microchannels Structure

Shuchi Liao, Tianliang Zhai, and Hesheng Xia\*

State Key Laboratory of Polymer Materials Engineering, Polymer Research Institute,  
Sichuan University, Chengdu, 610065, China

\*E-mail: xiahs@scu.edu.cn

### 1. Slush bath<sup>1</sup>

The slush bath was prepared by slowly pouring liquid nitrogen into ethyl acetate with stirring in a Dewar bottle. The slush bath can be kept for a few hours at low temperature ( $-85\text{ }^{\circ}\text{C}$  to  $-45\text{ }^{\circ}\text{C}$  for 2.5h) .

### 2. Electro spraying device

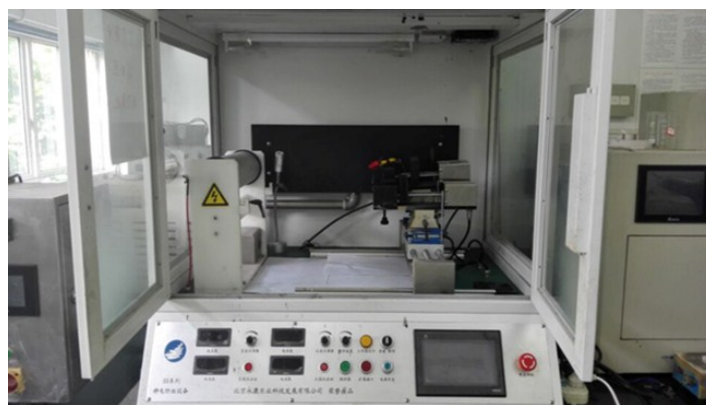

Figure S1. The picture of Electro spraying device (Beijing Yongkang Co. Ltd, China)

### 3. Optimization of electrspraying parameters

The appropriate voltage and distance between the tip of the needle to the surface of the target liquid in the container are important for fabricating desirable microspheres. Within a constant distance, as low voltage was applied, the liquid dripped from the tip of needle to form huge and nonspherical particles (Figure S2a) because electric force is not enough for the split-up of droplets. In contrast, too strong voltage could cause

an unstable “*Taloy cone*” jet<sup>2</sup>, resulting in non-uniform particles (Figure S2 c). Only when the moderately high voltage was applied, the stable “*Taloy cone*” can be obtained to prepare the GOAMs with desirable morphology (Figure S2 b-e). On the other hand, the distance between electrodes also plays an important role in controlling the morphology of the microspheres. When the distance is not long enough for the fully splitting of charged droplet, big microspheres along with small microspheres were formed (Figure S2 d) no matter how high the voltage is. When the distance is too long, the droplets have increasing kinetic energy to hit the cold liquid surface, which causes the deterioration of sphericity (Figure S2 f). In our experiments the optimized electrospaying conditions are that the distance is 10 cm with an applied voltage of 8 kV and the voltage should increase slightly as the flow rate increases.

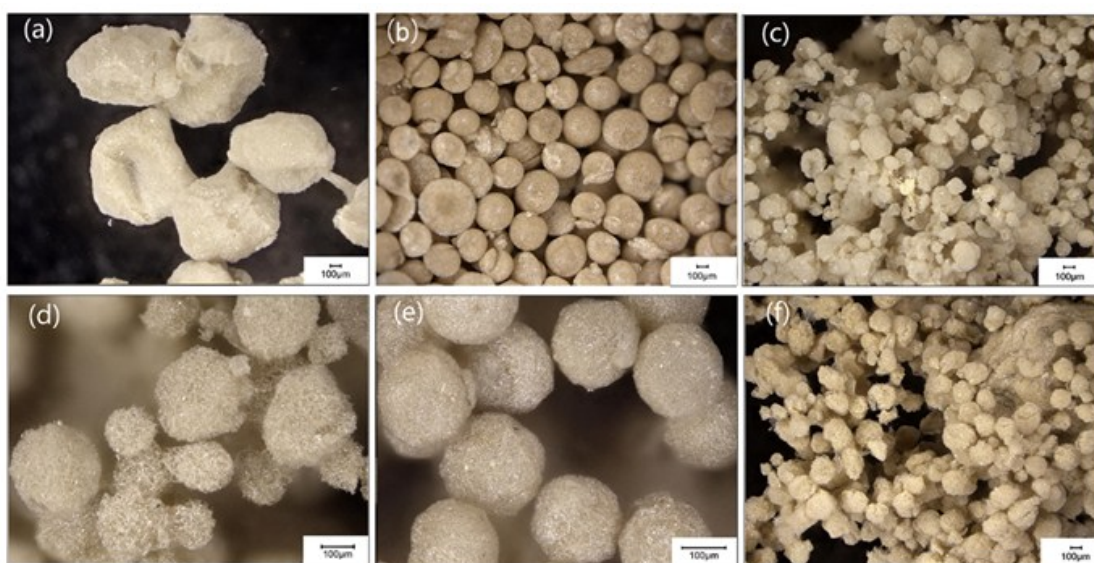

Figure S2. Optical microscope images of GOAMs fabricated in different electrospaying conditions at a flow rate of GO dispersion (7.5 ml/h) and GO concentration (6 mg/ml): (a) Distance: 10 cm, Applied voltage: 6.5 kV; (c) Distance: 10 cm, Applied voltage: 10 kV; (b) and (e) Distance: 10 cm, Applied voltage: 8 kV; (d): Distance: 6 cm, Applied voltage: 8 kV; (f) Distance: 14 cm, Applied voltage: 8 kV.

#### 4. Size-controllable fabrication of GOAMs

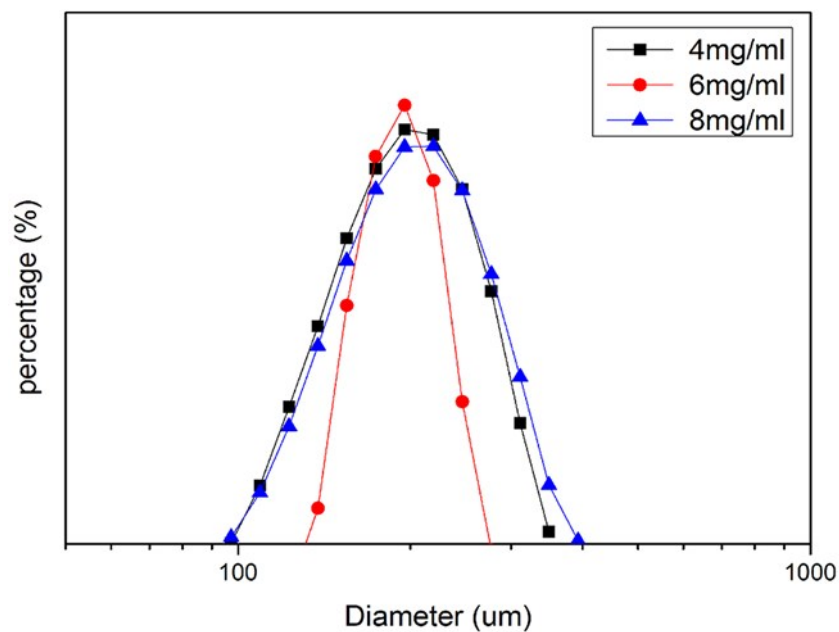

Figure S3. Grading analysis of GOAMs made from various GO concentrations (Distance between electrodes: 10 cm; Applied voltage: 8 kV, Flow rate of GO dispersion: 3.75 ml/h)

#### 5. Typical optical pictures of Dandelion-like GOAMs

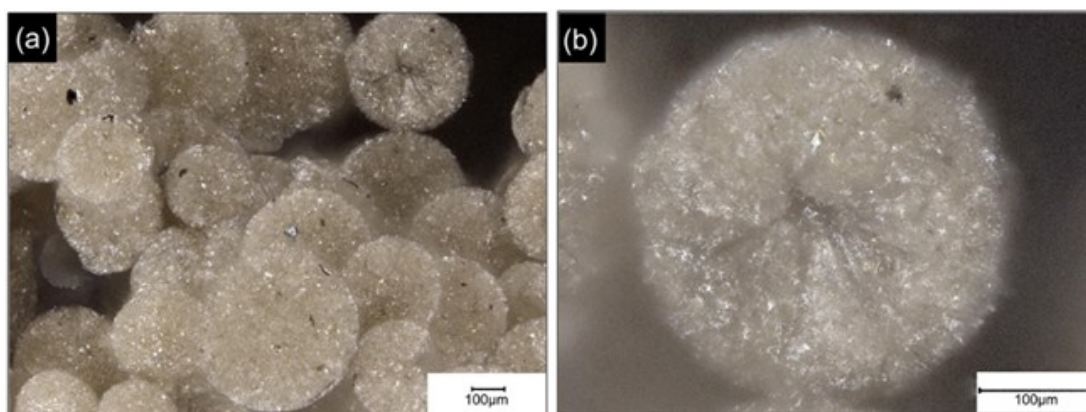

Figure S4. The optical pictures of GOAMs

## 6. Characterization of rGOAMs

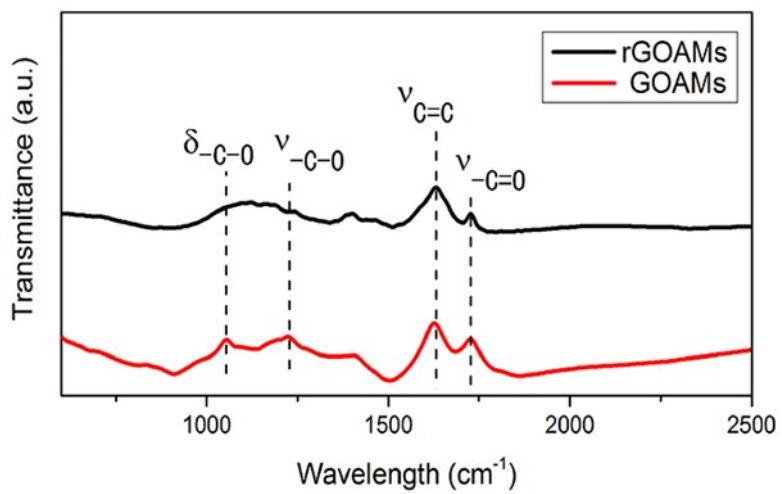

Figure S5. FTIR of GOAMs and rGOAMs

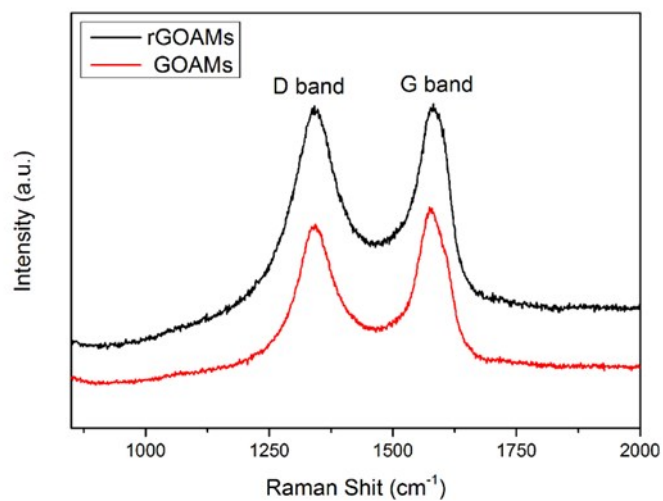

Figure S6. Raman spectra of GOAMs and rGOAMs

## 7. Absorption capacities as a function of densities ( $\rho$ ) of organic liquids.

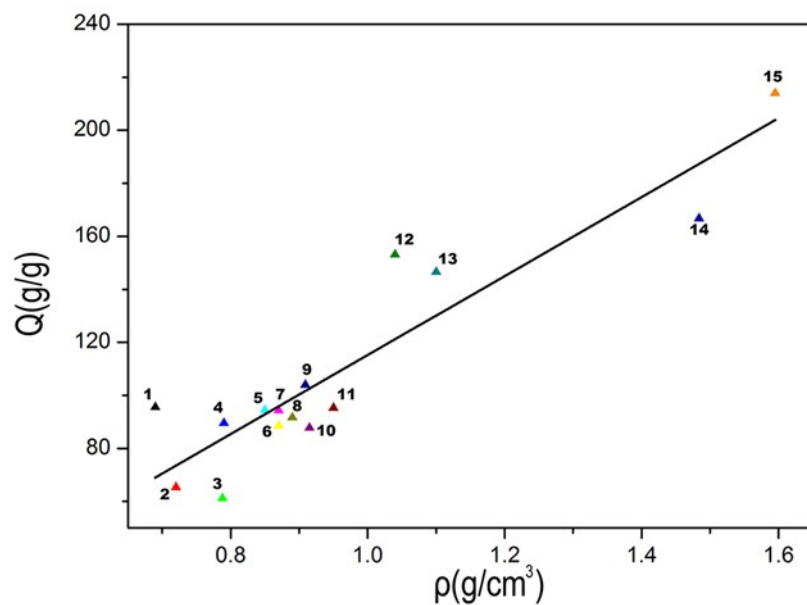

Figure S7. Absorption capacities as a function of densities of organic liquids, The numbers (1-15) represent: n-Hexane, Gasoline, Acetone, Ethanol, Diesel oil, Vegetable oil, Toluene, THF, DMF, 1,4-dioxane, Lubricating oil, Pump oil, DMSO, Chloroform, and Phenixin, respectively.

## 8. Comparison of various absorbents.

**Table S1. Comparison of various absorbents**

| <b>Absorbents</b>                                        | <b>Absorbates</b>                                                     | <b>Adsorption capacity(g·g<sup>-1</sup>)</b> | <b>Ref.</b> |
|----------------------------------------------------------|-----------------------------------------------------------------------|----------------------------------------------|-------------|
| 1. Graphene coated sponge                                | Oils and organic solvents                                             | 50-160                                       | 3           |
| 2. Spongy graphene                                       | Oils and organic solvents                                             | 20-86                                        | 4           |
| 3. Graphene sponge                                       | Oils and organic solvents                                             | 60-160                                       | 5           |
| 4. Soot treated spongy graphene                          | Oils and organic solvents                                             | 140-616                                      | 6           |
| 5. RGO foam                                              | Cyclohexane, chlorobenzene, toluene, petroleum, motor oil             | 5-40                                         | 7           |
| 6. RGO foam                                              | Oils and organic solvents                                             | 70-125                                       | 8           |
| 7. Graphene/polypyrrole foam                             | Diesel, kerosene, etc                                                 | 36.8-109                                     | 9           |
| 8. Graphene/CNTs foam                                    | Compressor oil, sesame oil, toluene, DMF chloroform, dichlorobenzene  | 80-130                                       | 10          |
| 9. Giant graphene/CNTs aerogel                           | Oils and organic solvents                                             | 215-743                                      | 11          |
| 10. Graphene/CNTs aerogel                                | Oils                                                                  | 110-140                                      | 12          |
| 11. Graphene/ $\alpha$ -FeOOH aerogel                    | Cyclohexane, toluene, gasoline, paraffin oil, vegetable oil, phenoxin | 12.5-26                                      | 13          |
| 12. Graphene/Cu <sub>2</sub> O aerogel                   | Oils                                                                  | 28-40                                        | 14          |
| 13. Graphene/ PVDF aerogels                              | Oils and organic solvents                                             | 20-70                                        | 15          |
| 14. Graphene aerogel (ethylenediamine reduction)         | Oils and organic solvents                                             | 120-250                                      | 16          |
| 15. Graphene aerogel (L-phenylalanine reduction)         | Oils and organic solvents                                             | 100-260                                      | 17          |
| 16. Graphene/resol aerogel                               | Organic solvents                                                      | 200-400                                      | 18          |
| 17. Ni-doped graphene/carbon Cryogel                     | Motor oil, vegetable oil                                              | 22.2-23.2                                    | 19          |
| 18. N-Doped Graphene Framework                           | Oils and organic solvents                                             | 200-600                                      | 20          |
| 19. r-EPGM (Reduced expanded porous graphene macroform)  | Oils                                                                  | 20-70                                        | 21          |
| 20. rGOAMs (Reduced graphene oxide aerogel microspheres) | Oils and organic solvents                                             | 60-214                                       | Our work    |

## 9. Control sample: unidirectional freezing-drying rGO monolith foam

The GO monolith foam was fabricated by unidirectional freeze-drying as described in reference<sup>22</sup> and was reduced to rGO monolith foam by the same thermal process as rGOAMs mentioned above.

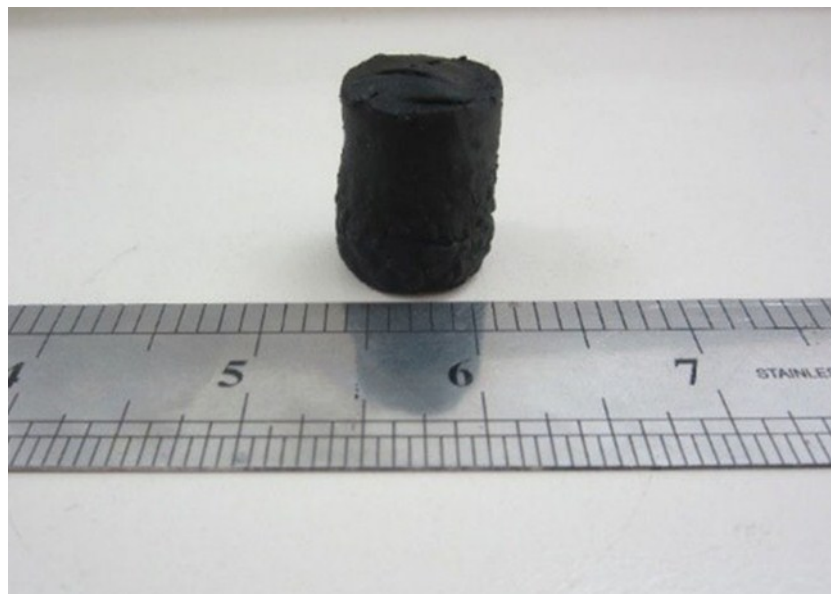

Figure S8. Photo of rGO monolith foam

## References

1. R. E. Rondeau, *J Chem Eng Data*, 1966, **11**, 124-124.
2. A. Jaworek and A. Krupa, *J.Aerogel.Sci*, 1999, **30**, 873-893.
3. D. D. Nguyen, N.-H. Tai, S.-B. Lee and W.-S. Kuo, *Energ Environ Sci*, 2012, **5**, 7908.
4. H. Bi, X. Xie, K. Yin, Y. Zhou, S. Wan, L. He, F. Xu, F. Banhart, L. Sun and R. S. Ruoff, *Adv. Funct. Mater*, 2012, **22**, 4421-4425.
5. J. Zhao, W. Ren and H.-M. Cheng, *J. Mater. Chem.*, 2012, **22**, 20197.
6. H. Bi, X. Xie, K. Yin, Y. Zhou, S. Wan, R. S. Ruoff and L. Sun, *J. Mater. Chem. A*, 2014, **2**, 1652-1656.
7. Z. Niu, J. Chen, H. H. Hng, J. Ma and X. Chen, *Adv. Mater.*, 2012, **24**, 4144-4150.
8. Y. He, Y. Liu, T. Wu, J. Ma, X. Wang, Q. Gong, W. Kong, F. Xing, Y. Liu and J. Gao, *J.Hazard .Mater*, 2013, **260**, 796-805.
9. H. Li, L. Liu and F. Yang, *Journal of Materials Chemistry A*, 2013, **1**, 3446.
10. X. Dong, J. Chen, Y. Ma, J. Wang, M. B. Chan-Park, X. Liu, L. Wang, W. Huang and P. Chen, *Chem. Commun*, 2012, **48**, 10660.
11. H. Sun, Z. Xu and C. Gao, *Adv. Mater.*, 2013, **25**, 2554-2560.
12. H. Hu, Z. Zhao, Y. Gogotsi and J. Qiu, *Environ. Sci & Technol*, 2014, **1**, 214-220.
13. H. P. Cong, X. C. Ren, P. Wang and S. H. Yu, *ACS Nano*, 2012, **6**, 2693-2703.
14. T. Wu, M. Chen, L. Zhang, X. Xu, Y. Liu, J. Yan, W. Wang and J. Gao, *J. Mater. Chem. A*, 2013, **1**, 7612.
15. R. Li, C. Chen, J. Li, L. Xu, G. Xiao and D. Yan, *J. Mater. Chem. A*, 2014, **2**, 3057.
16. J. Li, J. Li, H. Meng, S. Xie, B. Zhang, L. Li, H. Ma, J. Zhang and M. Yu, *J. Mater. Chem. A*,

- 2014, **2**, 2934.
17. L. Xu, G. Xiao, C. Chen, R. Li, Y. Mai, G. Sun and D. Yan, *J. Mater. Chem. A*, 2015, **3**, 7498-7504.
  18. Y. Qian, I. M. Ismail and A. Stein, *Carbon*, 2014, **68**, 221-231.
  19. G. Wei, Y. E. Miao, C. Zhang, Z. Yang, Z. Liu, W. W. Tjiu and T. Liu, *ACS Appl Mater & Inter*, 2013, **5**, 7584-7591.
  20. Y. Zhao, C. Hu, Y. Hu, H. Cheng, G. Shi and L. Qu, *Angew.Chem*, 2012, **51**, 11371-11375.
  21. Y. Tao, D. Kong, C. Zhang, W. Lv, M. Wang, B. Li, Z.-H. Huang, F. Kang and Q.-H. Yang, *Carbon*, 2014, **69**, 169-177.
  22. Y. Long, C. Zhang, X. Wang, J. Gao, W. Wang and Y. Liu, *J. Mater. Chem*, 2011, **21**, 13934.
